# Supplementary material for: The Two-Phase Emergence of Non Pandemic HIV-1 Group O in Cameroon
Source: PubMed Central journal article supplement (PMC4524642; doi:10.1371/journal.ppat.1005029), 2015-08-04

a)

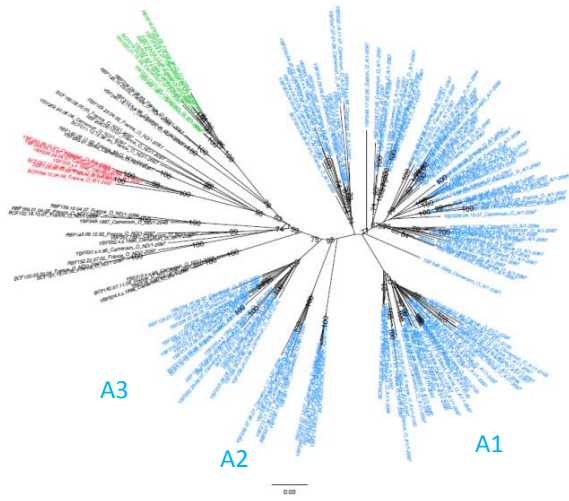

b)

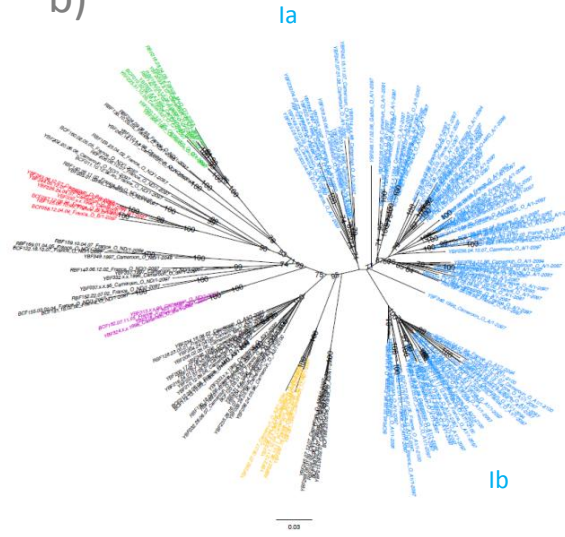

c)

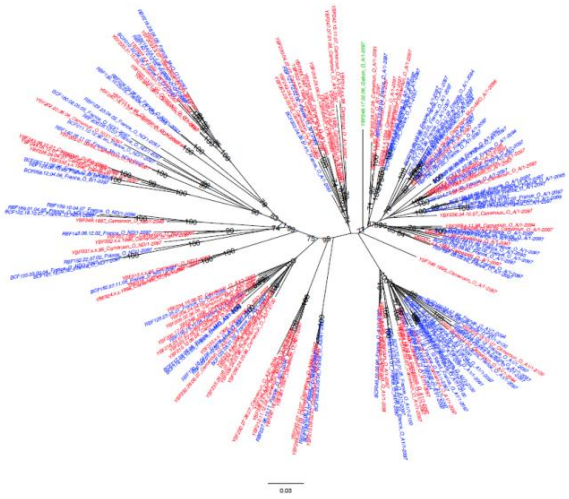

d)

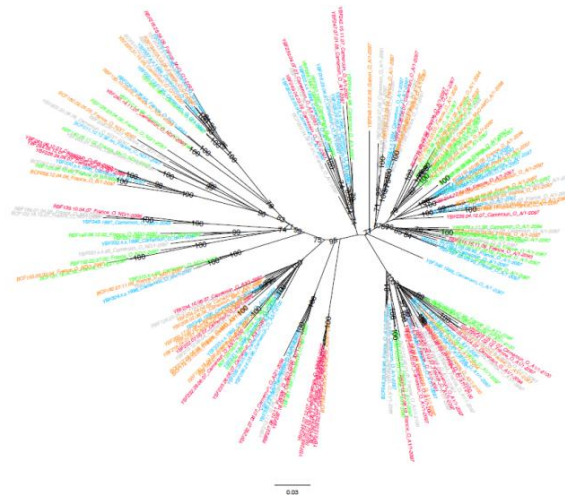

Supplement: ppat.1005029.s005.pdf [file ppat.1005029.s005.pdf]
